# Supplementary material for: Enhancing Hydrogen Storage Kinetics and Cycling Properties of NaMgH3 by 2D Transition Metal Carbide MXene Ti3C2
Source: MDPI journal article supplement (doi:10.3390/pr9101690), 2021-09-22
Supplement: s1 [file s1]

Archive with 1 entries (1 files):
- processes-1339375-supplementary.pdf
