# Supplementary material for: Enhancing Hydrogen Storage Kinetics and Cycling Properties of NaMgH3 by 2D Transition Metal Carbide MXene Ti3C2
Source: MDPI journal article supplement (doi:10.3390/pr9101690), 2021-09-22
Supplement: s1 [file s1 › processes-1339375-supplementary.pdf]

## **Supplementary Information**

# **Enhancing Hydrogen Storage Kinetics and Cycling Properties of NaMgH<sub>3</sub> by 2D Transition Metal Carbide MXene Ti<sub>3</sub>C<sub>2</sub>**

**Zhouming Hang, Zhencan Hu, Xuezhang Xiao<sup>\*</sup>, Ruicheng Jiang, Meng Zhang**

For dehydrogenation observation, the  $\text{NaMgH}_3$  and  $\text{NaMgH}_3$ -7 wt.%  $\text{Ti}_3\text{C}_2$  samples were heated in a home-made quartz tube at 400 °C. In order to prevent samples from oxygen and water, the quartz tube was connected to a vacuum pump. The photographs of two samples before and after dehydrogenation were contrasted in the Fig. S1.

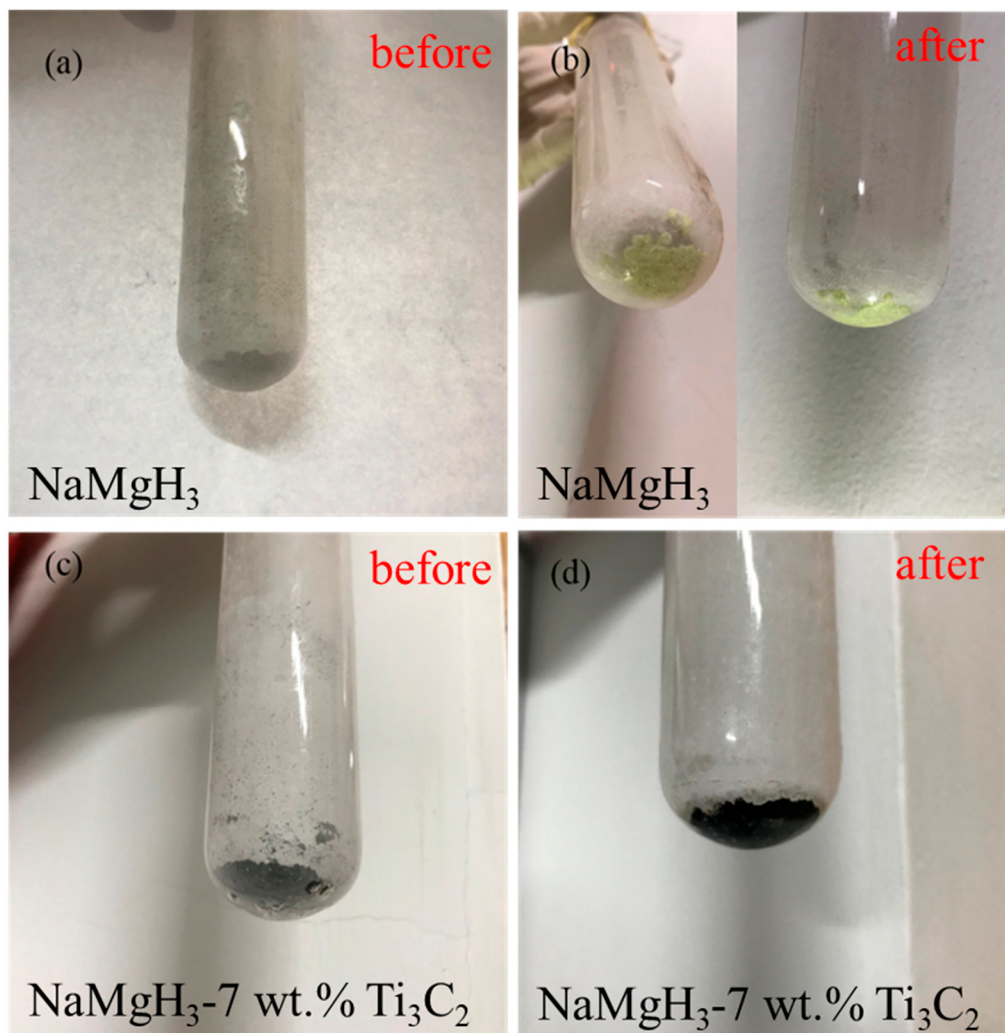

Figure S1. Photographs of pure  $\text{NaMgH}_3$  and  $\text{NaMgH}_3$ -7 wt.%  $\text{Ti}_3\text{C}_2$  (a and c) before and (b and d) after dehydrogenation at 400 °C;

In order to calculate the gravimetric heat storage capacities of  $\text{NaMgH}_3$  and  $\text{NaMgH}_3$ -7 wt.%  $\text{Ti}_3\text{C}_2$  samples, the differential scanning calorimeter (DSC) analyses were carried out. The DSC analyses were tested at a set heating rate of  $5\text{ }^\circ\text{C}/\text{min}$ , to obtain the exothermic peaks of two samples. The gravimetric heat storage capacities were determined by integrating the peak area in Fig. S2.

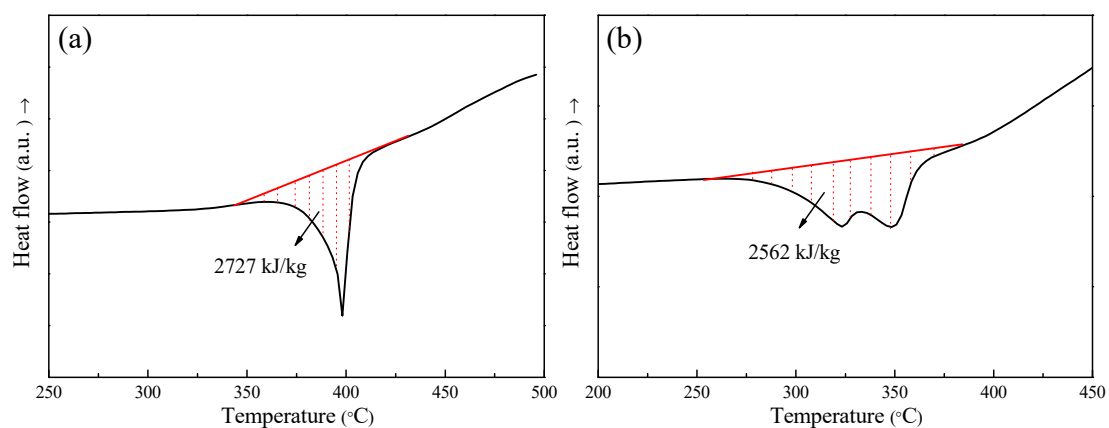

Figure S2. DSC profiles of (a) pure  $\text{NaMgH}_3$  and (b)  $\text{NaMgH}_3$ -7 wt.%  $\text{Ti}_3\text{C}_2$  at a heating rate of  $5\text{ }^\circ\text{C}/\text{min}$ .
